# Supplementary material for: Isolation of the Novel Phage PHB09 and Its Potential Use against the Plant Pathogen Pseudomonas syringae pv. actinidiae
Source: MDPI journal article supplement (doi:10.3390/v13112275), 2021-11-14
Supplement: s1 [file s1]

Table S1. The annotation of phage PHB09 genome.

| Gene | Start | End   | Length | Strand | Predicted function of the gene<br>product | e-value   | Identity(%) | Organism                          |
|------|-------|-------|--------|--------|-------------------------------------------|-----------|-------------|-----------------------------------|
| 1    | 274   | 131   | 144    | -      | hypothetical protein PJG4_015             | 4.48e-06  | 59.091      | Pseudomonas phage JG004           |
| 2    | 755   | 255   | 501    | -      | hypothetical protein PPSC2_140            | 8.95e-61  | 61.585      | Pseudomonas phage PPSC2           |
| 3    | 2592  | 799   | 1794   | -      | nicotinate phosphoribosyltransferase      | 0         | 81.282      | Pseudomonas phage REC             |
| 4    | 3523  | 2693  | 831    | -      | hypothetical protein PN09_032             | 3.88e-65  | 44.231      | Pseudomonas phage PN09            |
| 5    | 3983  | 3591  | 393    | -      | polynucleotide kinase                     | 3.53e-84  | 90          | Pseudomonas phage REC             |
| 6    | 4873  | 3980  | 894    | -      | RNA ligase                                | 6.22e-163 | 76.289      | Pseudomonas phage phiPsa300       |
| 7    | 5747  | 4923  | 825    | -      | SPFH domain-containing protein            | 6.06e-139 | 71.795      | Pseudomonas sp. MF7453            |
| 8    | 5938  | 5744  | 195    | -      | hypothetical protein PN09_032             | 1.54e-41  | 93.151      | Pseudomonas phage PN09            |
| 9    | 6160  | 5939  | 222    | -      | hypothetical protein BH774_gp017          | 1.54e-41  | 93.151      | Pseudomonas phage<br>vB_PsyM_KIL1 |
| 10   | 6729  | 6160  | 570    | -      | phosphoesterase                           | 2.25e-123 | 87.302      | Pseudomonas phage M5.1            |
| 11   | 7201  | 6722  | 480    | -      | hydrolase                                 | 5.35e-70  | 65.605      | Pseudomonas phage M5.1            |
| 12   | 7666  | 7259  | 408    | -      | hypothetical protein<br>vB_PsyM_KIL5_0021 | 2.17e-91  | 95.556      | Pseudomonas phage<br>vB_PsyM_KIL5 |
| 13   | 8840  | 7677  | 1164   | -      | putative DNA ligase                       | 0         | 79.146      | Pseudomonas phage<br>vB_PsyM_KIL3 |
| 14   | 9070  | 8837  | 234    | -      | putative DNA ligase                       | 1.17e-17  | 55.128      | Pseudomonas phage PPSC2           |
| 15   | 9561  | 9067  | 495    | -      | putative deoxycytidylate deaminase        | 9.59e-98  | 81.595      | Pseudomonas phage<br>vB_PsyM_KIL4 |
| 16   | 9721  | 9551  | 171    | -      | hypothetical protein PN09_045             | 2.80e-13  | 61.818      | Pseudomonas phage PN09            |
| 17   | 9945  | 9721  | 225    | -      | hypothetical protein M51_41               | 1.38e-31  | 70.27       | Pseudomonas phage M5.1            |
| 18   | 10265 | 9996  | 270    | -      | hypothetical protein PPSC2_159            | 1.35e-59  | 100         | Pseudomonas phage PPSC2           |
| 19   | 10488 | 10258 | 231    | -      | hypothetical protein PPSC2_160            | 1.08e-28  | 73.684      | Pseudomonas phage PPSC2           |

|    |       |       |      |   |                                           |           |        |                                   |
|----|-------|-------|------|---|-------------------------------------------|-----------|--------|-----------------------------------|
| 20 | 11168 | 10554 | 615  | - | putative serine protease                  | 1.52e-142 | 95.61  | Pseudomonas phage<br>vB_PsyM_KIL2 |
| 21 | 11937 | 11161 | 777  | - | putative phosphate starvation protein     | 0         | 97.674 | Pseudomonas phage<br>vB_PsyM_KIL2 |
| 22 | 12332 | 11979 | 354  | - | hypothetical protein<br>vB_PsyM_KIL2_0034 | 2.89e-67  | 86.325 | Pseudomonas phage<br>vB_PsyM_KIL2 |
| 23 | 12531 | 12334 | 198  | - | hypothetical protein PPSC2_164            | 1.66e-06  | 41.667 | Pseudomonas phage PPSC2           |
| 24 | 12959 | 12528 | 432  | - | hypothetical protein FDI83_gp034          | 1.11e-68  | 80.451 | Pseudomonas phage<br>vB_PsyM_KIL4 |
| 25 | 13784 | 14101 | 318  | + | hypothetical protein REC_48               | 6.40e-64  | 94.286 | Pseudomonas phage REC             |
| 26 | 15324 | 15446 | 123  | + | hypothetical protein                      |           |        |                                   |
| 27 | 15483 | 15608 | 126  | + | hypothetical protein BH774_gp158          | 9.49e-20  | 97.561 | Pseudomonas phage<br>vB_PsyM_KIL1 |
| 28 | 17067 | 17201 | 135  | + | hypothetical protein                      |           |        |                                   |
| 29 | 17297 | 17713 | 417  | + | putative HNH endonuclease                 | 3.56e-81  | 83.333 | Pseudomonas phage<br>vB_PsyM_KIL2 |
| 30 | 18064 | 18687 | 624  | + | hypothetical protein BH774_gp155          | 7.42e-63  | 44     | Pseudomonas phage<br>vB_PsyM_KIL1 |
| 31 | 18723 | 20273 | 1551 | + | hypothetical protein KKIINIFJ_00071       | 1.20e-85  | 42.361 | Pseudomonas phage PN05            |
| 32 | 20290 | 20511 | 222  | + | hypothetical protein psageK4_063          | 1.75e-16  | 63.014 | Pseudomonas phage psageK4         |
| 33 | 20659 | 22128 | 1470 | + | terminase-like family protein             | 0         | 94.274 | Pseudomonas phage VCM             |
| 34 | 22137 | 23606 | 1470 | + | hypothetical protein BH774_gp151          | 0         | 98.364 | Pseudomonas phage<br>vB_PsyM_KIL1 |
| 35 | 23615 | 24064 | 450  | + | putative methyltransferase                | 6.26e-95  | 91.946 | Pseudomonas phage<br>vB_PsyM_KIL1 |

|    |       |       |      |   |                                           |           |        |                                   |
|----|-------|-------|------|---|-------------------------------------------|-----------|--------|-----------------------------------|
| 36 | 24061 | 24975 | 915  | + | hypothetical protein BH774_gp149          | 0         | 96.053 | Pseudomonas phage<br>vB_PsyM_KIL1 |
| 37 | 25000 | 25386 | 387  | + | hypothetical protein BH774_gp148          | 4.48e-82  | 96.094 | Pseudomonas phage<br>vB_PsyM_KIL1 |
| 38 | 25400 | 26461 | 1062 | + | major capsid protein                      | 0         | 97.734 | Pseudomonas phage<br>vB_PsyM_KIL4 |
| 39 | 26517 | 26999 | 483  | + | hypothetical protein BH774_gp146          | 1.96e-105 | 91.25  | Pseudomonas phage<br>vB_PsyM_KIL1 |
| 40 | 26983 | 27450 | 468  | + | hypothetical protein BH774_gp145          | 1.36e-103 | 94.156 | Pseudomonas phage<br>vB_PsyM_KIL1 |
| 41 | 27461 | 27829 | 369  | + | head-to-tail stopper                      | 9.54e-70  | 81.967 | Pseudomonas phage M5.1            |
| 42 | 27826 | 28395 | 570  | + | hypothetical protein<br>vB_PsyM_KIL2_0064 | 8.72e-127 | 89.947 | Pseudomonas phage<br>vB_PsyM_KIL2 |
| 43 | 28407 | 29690 | 1284 | + | hypothetical protein VCM_00104            | 0         | 84.543 | Pseudomonas phage VCM             |
| 44 | 29723 | 30247 | 525  | + | hypothetical protein BH774_gp139          | 1.44e-121 | 98.851 | Pseudomonas phage<br>vB_PsyM_KIL1 |
| 45 | 30311 | 30814 | 504  | + | hypothetical protein BH774_gp138          | 5.8e-106  | 89.222 | Pseudomonas phage<br>vB_PsyM_KIL1 |
| 46 | 30825 | 31358 | 534  | + | hypothetical protein BH774_gp137          | 2.12e-117 | 93.22  | Pseudomonas phage<br>vB_PsyM_KIL1 |
| 47 | 31372 | 31734 | 363  | + | hypothetical protein BH774_gp135          | 2.85e-73  | 93.333 | Pseudomonas phage<br>vB_PsyM_KIL1 |
| 48 | 31758 | 31985 | 228  | + | hypothetical protein                      | 2.27e-41  | 86.667 | Pseudomonas phage<br>vB_PsyM_KIL4 |
| 49 | 31996 | 34344 | 2349 | + | putative tape measure protein             | 0         | 85.969 | Pseudomonas phage<br>vB_PsyM_KIL4 |

|    |       |       |      |   |                                           |           |        |                                   |
|----|-------|-------|------|---|-------------------------------------------|-----------|--------|-----------------------------------|
| 50 | 34344 | 35108 | 765  | + | hypothetical protein BH774_gp132          | 1.89e-166 | 87.795 | Pseudomonas phage<br>vB_PsyM_KIL1 |
| 51 | 35118 | 35459 | 342  | + | hypothetical protein BH774_gp131          | 2.20e-75  | 95.575 | Pseudomonas phage<br>vB_PsyM_KIL1 |
| 52 | 35465 | 36388 | 924  | + | putative structural protein               | 0         | 93.485 | Pseudomonas phage<br>vB_PsyM_KIL1 |
| 53 | 36385 | 37149 | 765  | + | putative baseplate protein                | 9.3e-169  | 88.538 | Pseudomonas phage<br>vB_PsyM_KIL1 |
| 54 | 37151 | 37516 | 366  | + | putative tail lysozyme                    | 8.85e-76  | 90.083 | Pseudomonas phage<br>vB_PsyM_KIL1 |
| 55 | 37520 | 38977 | 1458 | + | putative baseplate component              | 0         | 91.34  | Pseudomonas phage<br>vB_PsyM_KIL1 |
| 56 | 38990 | 39724 | 735  | + | hypothetical protein FDI83_gp133          | 2.2e-157  | 90.574 | Pseudomonas phage<br>vB_PsyM_KIL4 |
| 57 | 39734 | 42010 | 2277 | + | hypothetical protein VCM_00091            | 3.4e-178  | 42.699 | Pseudomonas phage VCM             |
| 58 | 42010 | 42288 | 279  | + | hypothetical protein                      | 1.43e-09  | 30.864 | Pseudomonas flexibilis            |
| 59 | 42334 | 43809 | 1476 | + | hypothetical protein VCM_00089            | 0         | 63.211 | Pseudomonas phage VCM             |
| 60 | 43809 | 44369 | 561  | + | putative endolysin                        | 5.6e-129  | 94.624 | Pseudomonas phage<br>vB_PsyM_KIL1 |
| 61 | 44380 | 44631 | 252  | + | hypothetical protein BH774_gp121          | 7.02e-51  | 97.59  | Pseudomonas phage<br>vB_PsyM_KIL1 |
| 62 | 44647 | 45072 | 426  | + | hypothetical protein<br>vB_PsyM_KIL3_0083 | 1.87e-80  | 82.27  | Pseudomonas phage<br>vB_PsyM_KIL3 |
| 63 | 45038 | 45241 | 204  | + | hypothetical protein phiPsa315_091        | 1.31e-32  | 81.25  | Pseudomonas phage phiPsa315       |
| 64 | 45222 | 45653 | 432  | + | hypothetical protein BH774_gp119          | 1.15e-79  | 77.931 | Pseudomonas phage<br>vB_PsyM_KIL1 |



|    |       |       |      |   |                                           |          |        |                                   |
|----|-------|-------|------|---|-------------------------------------------|----------|--------|-----------------------------------|
| 65 | 45797 | 46099 | 303  | + | hypothetical protein BH774_gp117          | 3.16e-60 | 98.925 | Pseudomonas phage<br>vB_PsyM_KIL1 |
| 66 | 46112 | 46432 | 321  | + | hypothetical protein BH774_gp116          | 5.37e-66 | 93.333 | Pseudomonas phage<br>vB_PsyM_KIL1 |
| 67 | 47591 | 46449 | 1143 | - | putative RNA ligase                       | 0        | 85.263 | Pseudomonas phage<br>vB_PsyM_KIL2 |
| 68 | 47901 | 47608 | 294  | - | hypothetical protein BH774_gp114          | 1.94e-33 | 61.386 | Pseudomonas phage<br>vB_PsyM_KIL1 |
| 69 | 48015 | 48143 | 129  | + | hypothetical protein                      |          |        |                                   |
| 70 | 48291 | 48605 | 315  | + | hypothetical protein PPSC2_34             | 4.38e-67 | 92.308 | Pseudomonas phage PPSC2           |
| 71 | 48605 | 48799 | 195  | + | hypothetical protein                      |          |        |                                   |
| 72 | 48804 | 49235 | 432  | + | hypothetical protein VCM_00078            | 1.98e-43 | 55.385 | Pseudomonas phage VCM             |
| 73 | 49232 | 49444 | 213  | + | hypothetical protein BH774_gp111          | 7.09e-34 | 81.429 | Pseudomonas phage<br>vB_PsyM_KIL1 |
| 74 | 49441 | 49674 | 234  | + | hypothetical protein                      |          |        |                                   |
| 75 | 49677 | 49871 | 195  | + | hypothetical protein FDI83_gp117          | 1.78e-26 | 74.603 | Pseudomonas phage<br>vB_PsyM_KIL4 |
| 76 | 49966 | 50583 | 618  | + | hypothetical protein M51_121              | 8.7e-114 | 80.392 | Pseudomonas phage M5.1            |
| 77 | 51015 | 51356 | 342  | + | hypothetical protein PPSC2_42             | 8.83e-32 | 50.45  | Pseudomonas phage PPSC2           |
| 78 | 51356 | 51556 | 201  | + | hypothetical protein<br>vB_PsyM_KIL2_0103 | 1.63e-32 | 80.303 | Pseudomonas phage<br>vB_PsyM_KIL2 |
| 79 | 51534 | 51686 | 153  | + | hypothetical protein BH774_gp104          | 1.64e-08 | 87.805 | Pseudomonas phage<br>vB_PsyM_KIL1 |
| 80 | 51679 | 52026 | 348  | + | hypothetical protein REC_124              | 7.7e-50  | 67.241 | Pseudomonas phage REC             |
| 81 | 52023 | 52190 | 168  | + | hypothetical protein FDI83_gp109          | 2.96e-26 | 87.273 | Pseudomonas phage<br>vB_PsyM_KIL4 |

|     |       |       |      |   |                                           |          |        |                                   |
|-----|-------|-------|------|---|-------------------------------------------|----------|--------|-----------------------------------|
| 82  | 52187 | 54064 | 1878 | + | putative DNA primase/helicase             | 0        | 93.821 | Pseudomonas phage<br>vB_PsyM_KIL1 |
| 83  | 54122 | 56416 | 2295 | + | DNA polymerase                            | 0        | 80.313 | Pseudomonas phage REC             |
| 84  | 56611 | 56874 | 264  | + | hypothetical protein M51_127              | 1.23e-21 | 59.77  | Pseudomonas phage M5.1            |
| 85  | 56871 | 57062 | 192  | + | hypothetical protein                      |          |        |                                   |
| 86  | 57049 | 57234 | 186  | + | hypothetical protein BH774_gp097          | 3.09e-23 | 68.333 | Pseudomonas phage<br>vB_PsyM_KIL1 |
| 87  | 57267 | 57689 | 423  | + | hypothetical protein VCM_00065            | 4.05e-40 | 49.359 | Pseudomonas phage VCM             |
| 88  | 57797 | 58804 | 1008 | + | hypothetical protein REC_132              | 0        | 90.093 | Pseudomonas phage REC             |
| 89  | 58858 | 58977 | 120  | + | hypothetical protein BH774_gp093          | 2.15e-07 | 87.179 | Pseudomonas phage<br>vB_PsyM_KIL1 |
| 90  | 58989 | 59240 | 252  | + | hypothetical protein BH774_gp091          | 1.29e-49 | 98.795 | Pseudomonas phage<br>vB_PsyM_KIL1 |
| 91  | 59294 | 60331 | 1038 | + | hypothetical protein VCM_00060            | 0        | 90.725 | Pseudomonas phage VCM             |
| 92  | 60328 | 60543 | 216  | + | hypothetical protein CF96_gp104           | 1.1e-06  | 38.776 | Pseudomonas phage phiPsa374       |
| 93  | 60536 | 61090 | 555  | + | hypothetical protein VCM_00058            | 4.2e-111 | 84.239 | Pseudomonas phage VCM             |
| 94  | 61090 | 61230 | 141  | + | hypothetical protein                      |          |        |                                   |
| 95  | 61235 | 61591 | 357  | + | hypothetical protein VCM_00057            | 5.05e-58 | 76.271 | Pseudomonas phage VCM             |
| 96  | 61588 | 61803 | 216  | + | hypothetical protein                      |          |        |                                   |
| 97  | 61800 | 61970 | 171  | + | hypothetical protein                      |          |        |                                   |
| 98  | 61967 | 62740 | 774  | + | hypothetical protein<br>vB_PsyM_KIL5_0122 | 4.7e-178 | 92.969 | Pseudomonas phage<br>vB_PsyM_KIL5 |
| 99  | 62753 | 63001 | 249  | + | hypothetical protein phiK7A1_123          | 6.83e-14 | 72.093 | Pseudomonas phage phiK7A1         |
| 100 | 63053 | 63265 | 213  | + | putative baseplate protein                | 9.3e-169 | 88.538 | Pseudomonas phage<br>vB_PsyM_KIL1 |

|     |       |       |      |   |                                                      |          |        |                                   |
|-----|-------|-------|------|---|------------------------------------------------------|----------|--------|-----------------------------------|
| 101 | 63262 | 63414 | 153  | + | hypothetical protein BH774_gp084                     | 4.22e-22 | 84     | Pseudomonas phage<br>vB_PsyM_KIL1 |
| 102 | 63411 | 63623 | 213  | + | hypothetical protein BH774_gp083                     | 1.64e-30 | 85.075 | Pseudomonas phage<br>vB_PsyM_KIL1 |
| 103 | 63616 | 64167 | 552  | + | hypothetical protein phiPsa315_124                   | 7.68e-62 | 75.385 | Pseudomonas phage phiPsa315       |
| 104 | 64261 | 65181 | 921  | + | flavin-dependent thymidylate synthase                | 1.3e-173 | 76.038 | Pseudomonas phage REC             |
| 105 | 65162 | 65602 | 441  | + | HNH homing endonuclease                              | 4.3e-105 | 100    | Pseudomonas phage PHB09           |
| 106 | 65589 | 65801 | 213  | + | hypothetical protein                                 |          |        |                                   |
| 107 | 65794 | 66129 | 336  | + | hypothetical protein CF96_gp095                      | 6.95e-70 | 89.189 | Pseudomonas phage phiPsa374       |
| 108 | 66139 | 67194 | 1056 | + | ribonucleotide-diphosphate reductase<br>subunit beta | 0        | 90.462 | Pseudomonas phage VCM             |
| 109 | 67191 | 68921 | 1731 | + | ribonucleoside-diphosphate reductase<br>NrdZ         | 0        | 95.486 | Pseudomonas phage VCM             |
| 110 | 68989 | 69180 | 192  | + | hypothetical protein PPSC2_68                        | 3.8e-12  | 53.226 | Pseudomonas phage PPSC2           |
| 111 | 69180 | 69353 | 174  | + | hypothetical protein<br>vB_PsyM_KIL2_0136            | 4.98e-28 | 85.965 | Pseudomonas phage<br>vB_PsyM_KIL2 |
| 112 | 69350 | 69544 | 195  | + | hypothetical protein REC_150                         | 4.73e-31 | 82.258 | Pseudomonas phage REC             |
| 113 | 69544 | 69876 | 333  | + | hypothetical protein BH774_gp072                     | 2.19e-65 | 84.404 | Pseudomonas phage<br>vB_PsyM_KIL1 |
| 114 | 69879 | 70049 | 171  | + | hypothetical protein<br>vB_PsyM_KIL2_0139            | 1.87e-28 | 87.5   | Pseudomonas phage<br>vB_PsyM_KIL2 |
| 115 | 70042 | 70179 | 138  | + | hypothetical protein FDI83_gp076                     | 4.72e-20 | 91.111 | Pseudomonas phage<br>vB_PsyM_KIL4 |
| 116 | 70189 | 70413 | 225  | + | putative glutaredoxin                                | 2.22e-40 | 87.838 | Pseudomonas phage<br>vB_PsyM_KIL1 |

|     |       |       |      |   |                                    |          |        |                                   |
|-----|-------|-------|------|---|------------------------------------|----------|--------|-----------------------------------|
| 117 | 70425 | 70838 | 414  | + | hypothetical protein FDI83_gp074   | 6.91e-79 | 84.672 | Pseudomonas phage<br>vB_PsyM_KIL4 |
| 118 | 70835 | 71275 | 441  | + | hypothetical protein PN09_139      | 4.69e-71 | 71.918 | Pseudomonas phage PN09            |
| 119 | 71290 | 71727 | 438  | + | hypothetical protein phiK7A1_138   | 5.8e-51  | 56.863 | Pseudomonas phage phiK7A1         |
| 120 | 71741 | 72154 | 414  | + | hypothetical protein VCM_00037     | 1.19e-41 | 56.204 | Pseudomonas phage VCM             |
| 121 | 72154 | 72420 | 267  | + | hypothetical protein psageK4_148   | 1.75e-17 | 51.111 | Pseudomonas phage psageK4         |
| 122 | 72496 | 72825 | 330  | + | hypothetical protein PPSC2_84      | 3.88e-25 | 41.085 | Pseudomonas phage PPSC2           |
| 123 | 72843 | 73007 | 165  | + | hypothetical protein PPSC2_83      | 2.0e-10  | 48.837 | Pseudomonas phage PPSC2           |
| 124 | 73009 | 74040 | 1032 | + | hypothetical protein phiPsa381_146 | 0        | 78.761 | Pseudomonas phage phiPsa381       |
| 125 | 74024 | 74230 | 207  | + | hypothetical protein               |          |        |                                   |
| 126 | 74247 | 74711 | 465  | + | hypothetical protein BH774_gp067   | 7.27e-79 | 75.51  | Pseudomonas phage<br>vB_PsyM_KIL1 |
| 127 | 74789 | 74929 | 141  | + | hypothetical protein VCM_00030     | 3.86e-14 | 71.739 | Pseudomonas phage VCM             |
| 128 | 74931 | 75326 | 396  | + | hypothetical protein PPSC2_89      | 3.25e-80 | 86.154 | Pseudomonas phage PPSC2           |
| 129 | 75323 | 75565 | 243  | + | hypothetical protein phiPsa315_146 | 2.78e-18 | 51.724 | Pseudomonas phage phiPsa315       |
| 130 | 75562 | 75891 | 330  | + | hypothetical protein M51_165       | 7.04e-50 | 78.182 | Pseudomonas phage M5.1            |
| 131 | 75893 | 76108 | 216  | + | hypothetical protein M51_166       | 9.26e-34 | 76.056 | Pseudomonas phage M5.1            |
| 132 | 76105 | 76338 | 234  | + | hypothetical protein BH774_gp060   | 2.32e-38 | 76.623 | Pseudomonas phage<br>vB_PsyM_KIL1 |
| 133 | 76338 | 76484 | 147  | + | hypothetical protein BH774_gp059   | 2.73e-21 | 91.667 | Pseudomonas phage<br>vB_PsyM_KIL1 |
| 134 | 76567 | 77523 | 957  | + | hypothetical protein CF96_gp068    | 2.5e-108 | 76.168 | Pseudomonas phage phiPsa374       |
| 135 | 77520 | 77714 | 195  | + | hypothetical protein BH774_gp058   | 6.42e-37 | 92.188 | Pseudomonas phage<br>vB_PsyM_KIL1 |
| 136 | 77931 | 78155 | 225  | + | hypothetical protein               |          |        |                                   |
| 137 | 78468 | 78274 | 195  | - | hypothetical protein               |          |        |                                   |

|     |       |       |      |   |                                           |          |        |                                   |
|-----|-------|-------|------|---|-------------------------------------------|----------|--------|-----------------------------------|
| 138 | 78726 | 79751 | 1026 | + | hypothetical protein<br>vB_PsyM_KIL2_0154 | 0        | 72.365 | Pseudomonas phage<br>vB_PsyM_KIL2 |
| 139 | 79820 | 80197 | 378  | + | hypothetical protein FDG98_gp072          | 1.06e-19 | 44.531 | Pseudomonas phage pf16            |
| 140 | 80200 | 80607 | 408  | + | hypothetical protein CNR37_00109          | 8.15e-21 | 39.85  | Pseudomonas phage ventosus        |
| 141 | 80638 | 80979 | 342  | + | hypothetical protein BH774_gp053          | 8.56e-57 | 87.379 | Pseudomonas phage<br>vB_PsyM_KIL1 |
| 142 | 81026 | 81274 | 249  | + | hypothetical protein BH774_gp050          | 1.18e-19 | 86.957 | Pseudomonas phage<br>vB_PsyM_KIL1 |
| 143 | 81276 | 81461 | 186  | + | hypothetical protein                      | 4.7e-15  | 58.182 | Myoviridae sp.                    |
| 144 | 81461 | 81586 | 126  | + | hypothetical protein                      |          |        |                                   |
| 145 | 81606 | 81881 | 276  | + | hypothetical protein                      |          |        |                                   |
| 146 | 82047 | 82163 | 117  | + | hypothetical protein                      | 1.41e-18 | 94.737 | Pseudomonas phage<br>vB_PsyM_KIL1 |
| 147 | 82166 | 82546 | 381  | + | hypothetical protein BH774_gp048          | 4.81e-77 | 91.2   | Pseudomonas phage<br>vB_PsyM_KIL1 |
| 148 | 82619 | 82912 | 294  | + | hypothetical protein FDG97_gp030          | 1.61e-41 | 69.697 | Pseudomonas phage phiPMW          |
| 149 | 83011 | 83337 | 327  | + | hypothetical protein                      | 8.76e-31 | 59.574 | Siphoviridae sp.                  |
| 150 | 83381 | 83731 | 351  | + | hypothetical protein CF96_gp058           | 4.16e-62 | 78.378 | Pseudomonas phage phiPsa374       |
| 151 | 83719 | 83850 | 132  | + | hypothetical protein BH774_gp045          | 3.54e-21 | 95.349 | Pseudomonas phage<br>vB_PsyM_KIL1 |
| 152 | 83921 | 84142 | 222  | + | hypothetical protein                      |          |        |                                   |
| 153 | 84224 | 84616 | 393  | + | hypothetical protein PPSC2_105            | 3.4e-57  | 62.963 | Pseudomonas phage PPSC2           |
| 154 | 84647 | 85072 | 426  | + | hypothetical protein FDI83_gp045          | 1.18e-47 | 57.931 | Pseudomonas phage<br>vB_PsyM_KIL4 |
| 155 | 85069 | 85206 | 138  | + | hypothetical protein                      |          |        |                                   |

|     |       |       |     |   |                                           |          |        |                                   |
|-----|-------|-------|-----|---|-------------------------------------------|----------|--------|-----------------------------------|
| 156 | 85203 | 85379 | 177 | + | hypothetical protein BH774_gp043          | 2.72e-27 | 87.037 | Pseudomonas phage<br>vB_PsyM_KIL1 |
| 157 | 85373 | 85711 | 339 | + | NADH oxidase H2O-forming                  | 2.94e-15 | 43.373 | Siphoviridae sp.                  |
| 158 | 85715 | 85924 | 210 | + | hypothetical protein                      |          |        |                                   |
| 159 | 86029 | 86163 | 135 | + | hypothetical protein                      |          |        |                                   |
| 160 | 86326 | 86571 | 246 | + | hypothetical protein psageK4_179          | 2.38e-08 | 38.554 | Pseudomonas phage psageK4         |
| 161 | 86643 | 86798 | 156 | + | hypothetical protein                      |          |        |                                   |
| 162 | 86860 | 87054 | 195 | + | hypothetical protein                      |          |        |                                   |
| 163 | 87075 | 87359 | 285 | + | hypothetical protein                      |          |        |                                   |
| 164 | 87431 | 87589 | 159 | + | hypothetical protein                      |          |        |                                   |
| 165 | 89204 | 88977 | 228 | - | hypothetical protein                      |          |        |                                   |
| 166 | 89406 | 89206 | 201 | - | hypothetical protein FDI83_gp003          | 2.79e-33 | 81.818 | Pseudomonas phage<br>vB_PsyM_KIL4 |
| 167 | 89653 | 89483 | 171 | - | hypothetical protein VCM_00184            | 7.10e-18 | 67.308 | Pseudomonas phage VCM             |
| 168 | 89853 | 89653 | 201 | - | hypothetical protein                      |          |        |                                   |
| 169 | 90038 | 89850 | 189 | - | hypothetical protein<br>vB_PsyM_KIL2_0004 | 7.55e-26 | 70.492 | Pseudomonas phage<br>vB_PsyM_KIL2 |
| 170 | 90316 | 90107 | 210 | - | hypothetical protein BH774_gp005          | 2.14e-17 | 68.657 | Pseudomonas phage<br>vB_PsyM_KIL1 |
| 171 | 90336 | 90458 | 123 | + | hypothetical protein                      |          |        |                                   |
| 172 | 90682 | 90500 | 183 | - | hypothetical protein                      |          |        |                                   |
| 173 | 90869 | 90651 | 219 | - | hypothetical protein                      |          |        |                                   |
| 174 | 91044 | 90862 | 183 | - | hypothetical protein                      |          |        |                                   |
| 175 | 91487 | 91041 | 447 | - | hypothetical protein MT_57028             | 1.05e-56 | 61.745 | Pseudomonas phage phiPto-<br>bp6g |

|     |       |       |     |   |                                           |           |        |                                   |
|-----|-------|-------|-----|---|-------------------------------------------|-----------|--------|-----------------------------------|
| 176 | 91609 | 91484 | 126 | - | hypothetical protein<br>vB_PsyM_KIL5_0008 | 4.75e-19  | 90.244 | Pseudomonas phage<br>vB_PsyM_KIL5 |
| 177 | 91887 | 91609 | 279 | - | hypothetical protein BH774_gp008          | 6.67e-57  | 90.217 | Pseudomonas phage<br>vB_PsyM_KIL1 |
| 178 | 92351 | 91875 | 477 | - | peptide chain release factor              | 4.59e-74  | 74.214 | Pseudomonas phage M5.1            |
| 179 | 92638 | 92435 | 204 | - | hypothetical protein BH774_gp009          | 2.23e-35  | 86.567 | Pseudomonas phage<br>vB_PsyM_KIL1 |
| 180 | 92823 | 92635 | 189 | - | hypothetical protein BH774_gp010          | 8.32e-34  | 88.71  | Pseudomonas phage<br>vB_PsyM_KIL1 |
| 181 | 93010 | 92816 | 195 | - | hypothetical protein VCM_00176            | 5.75e-28  | 77.049 | Pseudomonas phage VCM             |
| 182 | 93183 | 93007 | 177 | - | hypothetical protein BH774_gp011          | 1.50e-21  | 81.132 | Pseudomonas phage<br>vB_PsyM_KIL1 |
| 183 | 93518 | 93180 | 339 | - | hypothetical protein REC_12               | 1.44e-53  | 74.038 | Pseudomonas phage REC             |
| 184 | 93967 | 93632 | 336 | - | hypothetical protein BH774_gp013          | 3.80e-60  | 80.734 | Pseudomonas phage<br>vB_PsyM_KIL1 |
| 185 | 94214 | 93969 | 246 | - | hypothetical protein REC_19               | 3.10e-36  | 71.25  | Pseudomonas phage REC             |
| 186 | 94795 | 94214 | 582 | - | DNA recombination-mediator protein A      | 3.41e-114 | 82.199 | Pseudomonas phage VCM             |

---
